# Supplementary material
Source: HighWire-hosted journal article supplement (https://www.genetics.org/content/suppl/2012/02/08/190.2.403)
Supplement: TableS17.pdf [file TableS17.pdf]

**Table S17** Starting states for the calculation of probabilities of the two-locus X chromosome female diplotype of the form  $AA|AA$ , in the generation of four-way RIL by sibling mating

| Prototype | No. states | Initial pattern                                                                        | Initial probability |
|-----------|------------|----------------------------------------------------------------------------------------|---------------------|
| $AA AA$   | 2          |  (4)  | 1/2                 |
| $AB AB$   | 2          |  (9)  | 1/2                 |
| $AC AC$   | 4          |  (8)  | 1/4                 |
| $CC CC$   | 1          |  (10) | 1                   |
